# Supplementary material
Source: Springer Nature journal article supplement (https://www.springermedizin.de/resource/supplementary/12876_2009_388_MOESM1_ESM.pdf/9439306)
Supplement: MOESM1 [file 9439306]

1051 Pubmed/MEDLINE

476 EMBASE

987 excluded based on abstracts

Reasons: for exclusion:

- 13 animal studies
- 191 non-English studies
- 95 reviews
- 58 letters
- 30 editorials
- 302 with inclusion of malignant cases
- 85 single case reports
- 199 other studies
- 17 studies with intrahepatic strictures
- 14 studies with children included
- 10 studies with strictures of unknown origin
- 2 studies with cSEMS

451 excluded based on abstracts

Reasons for exclusion:

- 1 animal study
- 1 non English study
- 43 reviews
- 22 letters
- 19 editorials
- 176 with inclusion of malignant cases
- 40 single case reports
- 138 other studies
- 12 studies with children included
- 6 studies with intrahepatic strictures
- 2 studies with strictures of unknown origin

Full text retrieval (35)

Full text retrieval (16)

Total full text retrieval (51)

Duplicates (13)

Total full text retrieval (38)

Detected based on references (32)

Total articles retrieved (70)

No data on stents for benign strictures (23)

Total articles for data collection (47)
